# Supplementary material
Source: publisher figshare collection journal article supplement (https://rs.figshare.com/ndownloader/files/17811170)
Supplement: Supplementary file [file 17811170]

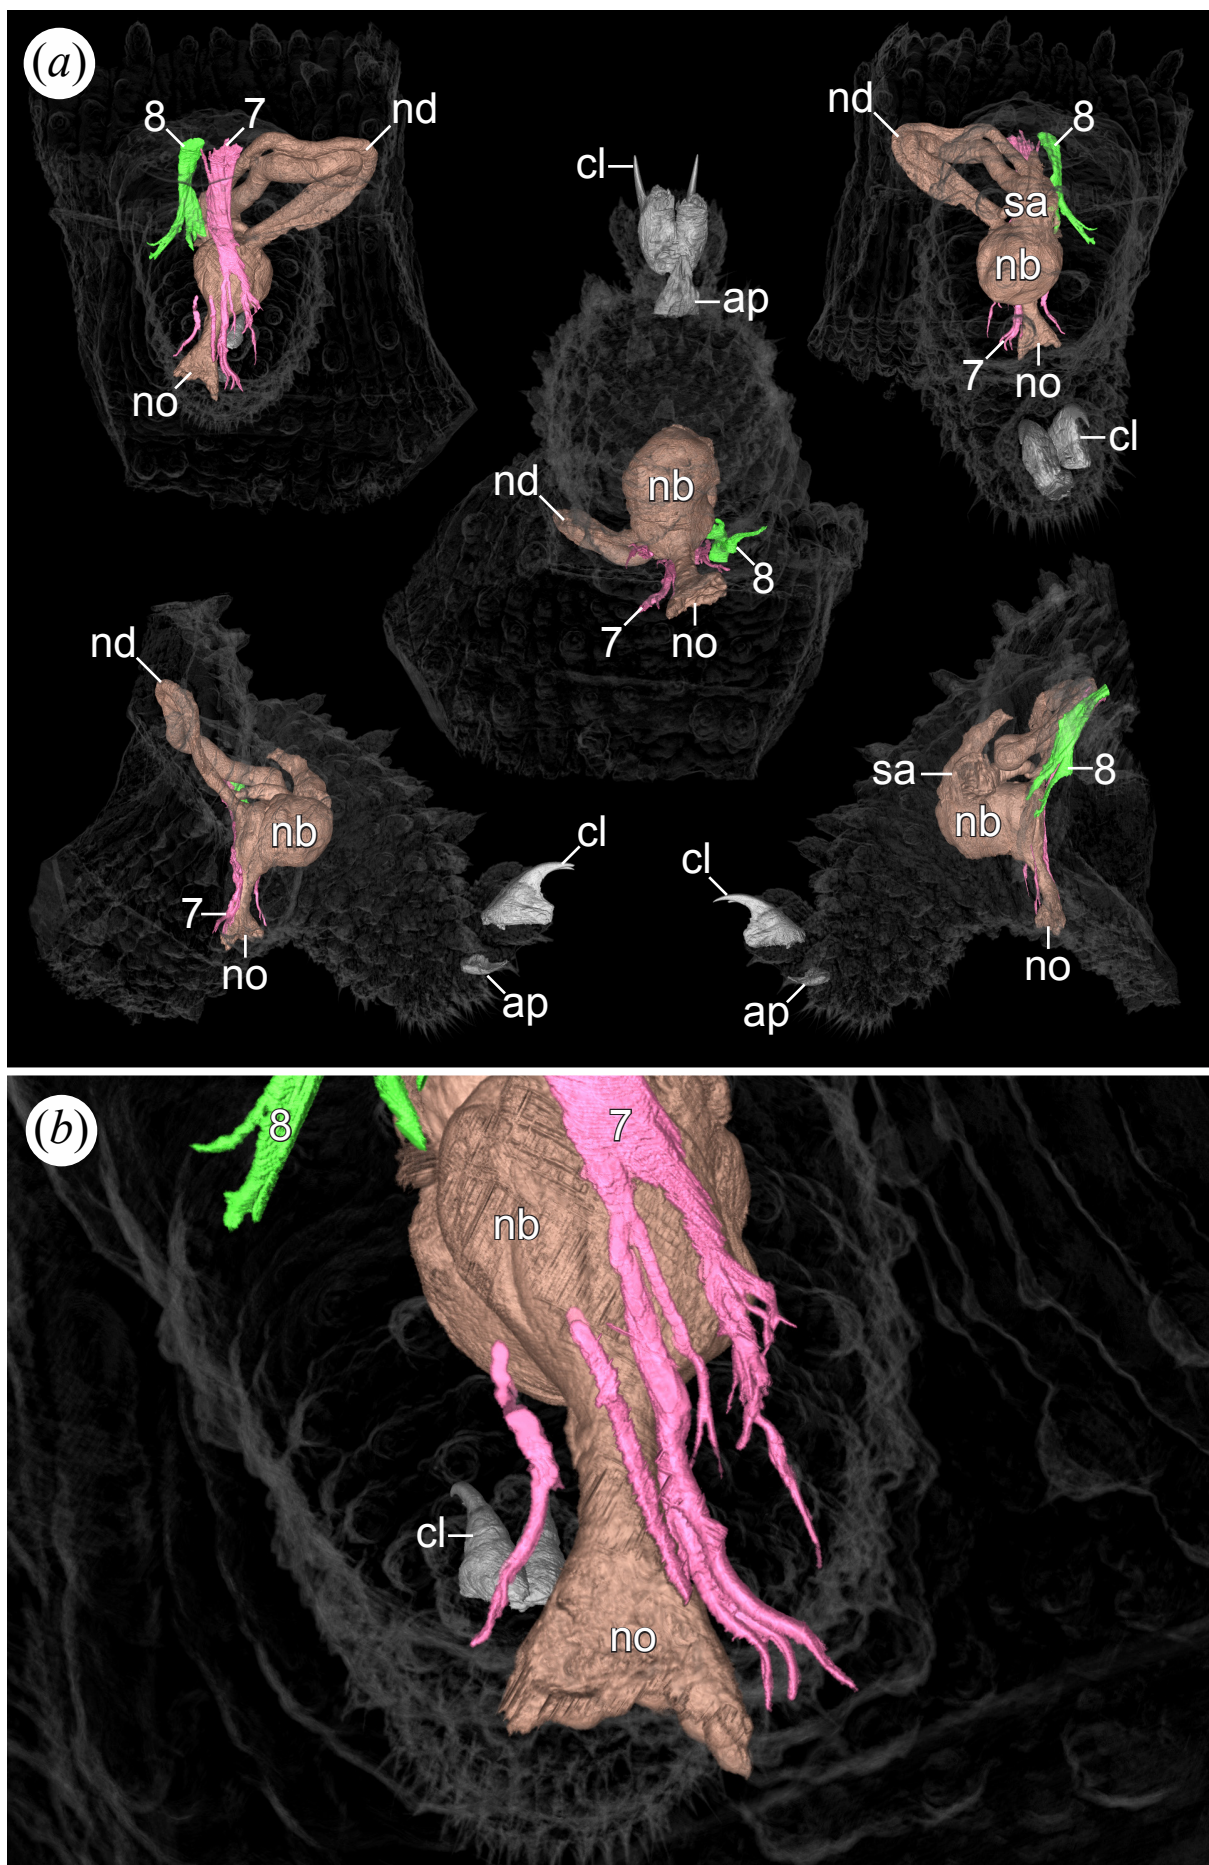

**Supplementary Figure 6. Spatial relationship between proximal leg muscles and the excretory organ in *E. rowelli*.** Volume rendering based on nanoCT data from left mid-trunk leg illustrating the anteroproximal (#7) and posteroproximal (#8) leg muscles and the nephridial system of the leg (in brown). Dorsal is up in all images except the centre image in **a** (distal is up). Body surface is semi-transparent. Note that leg muscles are not associated with the nephridial opening. **(a)** Lobopod viewed from different perspectives. **(b)** Detail of the leg viewed from trunk. Abbreviations: ap, foot apodeme; cl, claw; nb, nephridial bladder; nd, nephridial duct; no, nephridial opening; sa, sacculus.
